# Supplementary material
Source: publisher figshare collection journal article supplement (https://tandf.figshare.com/articles/dataset/_/11662914)
Supplement: Supplementary file 1 [file 1]

Archive with 9 entries (9 files):
- itxc_a_1578730_sm0297.docx
- itxc_a_1578730_sm0296.pdf
- itxc_a_1578730_sm0295.docx
- itxc_a_1578730_sm0294.docx
- itxc_a_1578730_sm0293.pdf
- itxc_a_1578730_sm0292.pdf
- itxc_a_1578730_sm0291.docx
- itxc_a_1578730_sm0290.docx
- itxc_a_1578730_sm0289.pdf
