# Supplementary material
Source: publisher figshare collection journal article supplement (https://tandf.figshare.com/articles/dataset/_/11662914)
Supplement: Supplementary file 1 [file 1 › itxc_a_1578730_sm0290.docx]

**Supplemental Table B: Summary of Non-Occupational Data (n=5)**

| **Study** | **Study Type** | **Country** | **Study Population** | **Study Details and Results** |
| --- | --- | --- | --- | --- |
| Bednar and Kies (1991) | Ecological | USA | 453 Nebraska communities in 1986-1987 compared with health data obtained from the 1986 Vital Statistics Report | Levels of nitrate and other inorganic contaminants in drinking water compared to the health data. Death rates per 100,000 populations from cancer, heart disease, cerebrovascular disease, pneumonia, and chronic lung disease evaluated.  No significant relationship observed between inorganic contaminants in drinking water and death of residents from heart disease or cancer.  Bednar and Kies stated that “this type of statistical analysis cannot be interpreted as proving or disproving a cause and effect relationship.” |
| Beaumont et al. (2008) | Ecological | China | Villages with Cr(VI)-contaminated drinking water compared to the general population in Liaoning Province (Time period: 1970 to 1978)  *Same population as Kerger et al. (2009) | Data on Cr(VI) contamination in groundwater and cancer mortality in 9 study regions near a ferrochromium factory evaluated to estimated person-years at risk, mortality counts, and rate ratios/95% CIs. Four areas designated as no or low Cr and 5 areas designated as high Cr.  Stomach cancer mortality substantially elevated in the high Cr vs. low Cr (1.82, 95%CI 1.11-2.91) and vs. the whole province (1.69, 1.12-2.44).  Beaumont et al. stated that “While these data are limited, they are consistent with increased stomach cancer risk in a population exposed to Cr(VI) in drinking water.” |
| Fryzek et al. (2001) | Ecological | USA | Communities of Kettleman City, Hinkley, and Topock (KHT, identified by zip codes) compared to non-KHT areas in Kings County or San Bernardino County  (Time period: 1989 to 1998) | Cr(VI) compounds were used as additives at certain water-cooling towers at 3 southern California gas compressor facilities in KHT. Age-adjusted mortality rates compared to the non-KHT areas.  Differences in the rates between the areas were small and not statistically significant.  Fryzek et al. found no evidence of cancer hazard and indicated that “study limitations preclude a definitive assessment of risk.” |
| Kerger et al. (2009) | Ecologic | China | Villages with Cr(VI)-contaminated drinking water compared to the general population in Liaoning Province  (Time period: 1970 to 1978) | Population divided into 3: residents of industrial town of TangHeZi, of 3 agricultural villages without Cr(VI) groundwater contamination, of 5 villages with Cr(VI) contamination. Local comparison groups were used instead of local or province averages.  Stomach cancer was not observed to be significantly different between the communities with Cr(VI) contamination vs. those without.  Kerger et al. stated that “overall findings in the studied population do not indicate a dose-response relationship or a coherent pattern of association of lung-, stomach-, or all-cancer mortality with exposure to Cr(VI)-contaminated groundwater.” |
| Linos et al. (2011) | Ecological | Greece | Residents in the Oinofita region of Greece where Cr contamination of water was observed. (Time period: 1999 to 2009) | SMRs calculated for all deaths, cancer deaths, and specific cancer types for the Oinofita region using the greater prefecture of Voiotia as the standard population. Cr levels in the drinking water ranged from 8.3 to 5.1 μg/L.  Elevated SMR of 121 was noted for stomach cancer but did not reach statistical significance.  Linos et al. indicated that the main limitation of the study was the duration of follow-up and stated the need for “longer follow-up, along with better characterization of Cr(VI), by focusing on specific chromium biomarkers.” |
