# Supplementary material
Source: publisher figshare collection journal article supplement (https://tandf.figshare.com/articles/dataset/_/11662914)
Supplement: Supplementary file 1 [file 1 › itxc_a_1578730_sm0291.docx]

**Supplemental Table C: Domains/risk of bias questions from NTP OHAT (2015)**

| **Domain** | **Question** | **Applicable to which studies?** |
| --- | --- | --- |
| Selection bias | 1. Was administered dose or exposure level adequately randomized? | Experimental animal, human controlled trials |
| 2. Was allocation to study groups adequately concealed? | Experimental animal, human controlled trials |
| 3. Did selection of study participants result in appropriate comparison groups? | Cohort, case-control, cross-sectional studies |
| Confounding bias | 4. Did the study design or analysis account for important confounding and modifying variables? | Cohort, case-control, cross-sectional, case series/case report |
| Performance bias | 5. Were experimental conditions identical across study groups? | Experimental animal |
| 6. Were the research personnel and human subjects blinded to the study group during the study? | Experimental animal, human controlled trials |
| Attrition/exclusion bias | 7. Were outcome data complete without attrition or exclusion from analysis? | Experimental animal, human controlled trials, cohort, case-control, cross-sectional |
| Detection bias | 8. Can we be confident in the exposure characterization? | Experimental animal, human controlled trials, cohort, case-control, cross-sectional, case series/case report |
| 9. Can we be confident in the outcome assessment? | Experimental animal, human controlled trials, cohort, case-control, cross-sectional, case series/case report |
| Selective reporting bias | 10. Were all measured outcomes reported? | Experimental animal, human controlled trials, cohort, case-control, cross-sectional, case series/case report |
| Other Bias | 11. Were there no other potential threats to internal validity (e.g., statistical methods were appropriate and researchers adhered to the study protocol)? | Experimental animal |
