# Supplementary material
Source: publisher figshare collection journal article supplement (https://tandf.figshare.com/articles/dataset/_/11662914)
Supplement: Supplementary file 1 [file 1 › itxc_a_1578730_sm0294.docx]

**Supplemental Table F: Publication bias analysis: Comparison of original results to those of Trim and Fill Test, all studies (n=44, analysis 1)**

|  | **Meta-RR (95%CI)** | **tau2** | **I2** | **H2** | **QE** | **QEp** | **k0** | **side** | **se.k0** | **k0.est** |
| --- | --- | --- | --- | --- | --- | --- | --- | --- | --- | --- |
| **Analysis 1** | 1.08  (0.96 to 1.21) | 0.03 | 25.13 | 1.34 | 63.84 | 0.06 | NA | NA | NA | NA |
| **Analysis 1 with Trim and Fill** | 1.05  (0.94 to 1.18) | 0.04 | 26.49 | 1.36 | 74.39 | 0.02 | 4 | left | 4.50 | L0 |

NA: Not applicable

k0 represents the number of “missing” studies (i.e., number filled)

se.k0 represents the standard error in that number
