# Supplementary material
Source: publisher figshare collection journal article supplement (https://tandf.figshare.com/articles/dataset/_/11662914)
Supplement: Supplementary file 1 [file 1 › itxc_a_1578730_sm0295.docx]

**Supplemental Table G**: **Comparison of current and previously published Cr(VI) meta-analysis studies**

| **Publication/Study** | **Key Characteristics** | **Included Studies** | **Meta-Analysis Results** |
| --- | --- | --- | --- |
| Cole and Rodu (2005) | Studies published since 1950  Evaluated study quality  Subgrouped studies by socioeconomic status (SES) control | 14 studies (data available to control for economic status)  32 studies (no data available to control for economic status) | Meta-SMR  = 82 (95% CI: 69 to 96), Controlled for SES  Meta-SMR  = 137 (95% CI: 123 to 153),  Not controlled for SES |
| Gatto et al. (2010) | Studies published from 1950 to 2009  Calculated SMRs for cancers of GI tract  Evaluated by industry, geographical region, subcohorts of high Cr(VI) exposure  Evaluated bladder cancer risk (as a proxy to characterize smoking rate among the worker cohorts) | 29 studies | Meta-SMR for stomach cancer  = 1.09 (95% CI: 0.93 to 1.28)  Meta-SMR for bladder cancer  = 1.49 (95% CI: 1.20 to 1.85) |
| Welling et al. (2015) | No restrictions on publication year  Included registry studies, studies of cement workers (non-production), bricklayers, construction workers, masons, and shoe-makers  Calculated RR estimates for stomach cancer  Evaluated by industry, study type, geographical region, gender, industries with lung cancer risk >=1.5 | 56 studies | Meta-RR  = 1.27 (95% CI 1.18 to 1.38), all studies |
| Current study | No restrictions on publication year  Conducted systematic review using the NTP OHAT process  Evaluated by study type, “high” exposure subcohort, certain Cr(VI) industries with increased lung cancer risk.  Sensitivity analysis conducted to assess study quality impact | 44 human occupational studies with stomach cancer data  4 experimental animal studies (from 3 publications)_ | Meta-RR  = 1.08 (95%CI: 0.96 to 1.21), all studies, Analysis 1  Meta-RR  = 1.03 (95%CI: 0.84 to 1.26), excluding Tier 3 studies, Analysis 2  No increases in stomach cancer incidence, not statistically significant, or no stomach cancers observed |
