# Supplementary material
Source: publisher figshare collection journal article supplement (https://tandf.figshare.com/articles/dataset/_/11662914)
Supplement: Supplementary file 1 [file 1 › itxc_a_1578730_sm0296.pdf]

**Supplemental Table H: Comparison of studies included in the meta-analyses**

| Studies in Suh et al. or Welling et al. (2015)          | Industry                    | Risk ratios and 95% CIs in the current analysis | Comparisons with other meta-analyses                                                     |                                                     |                                                                                                                       |
|---------------------------------------------------------|-----------------------------|-------------------------------------------------|------------------------------------------------------------------------------------------|-----------------------------------------------------|-----------------------------------------------------------------------------------------------------------------------|
|                                                         |                             |                                                 | Cole and Rodu et al. (2005) (Verification source: Appendix B tables 14 to 17)            | Gatto et al. (2011) (Verification source: Figure 3) | Welling et al. (2015) (Verification source: Supplemental Table 1)                                                     |
| Ahn et al. 2006_Continuous casting                      | Stainless steel             | 1.02 (0.45 to 1.99)                             | Not included                                                                             | Not included                                        | Used SRR of 13.65 (95%CI 0.76 to 66.26) (stainless steel production of 10 to 35 years)                                |
| Ahn et al. 2006_Stainless steel                         |                             | 2.15 (0.35 to 6.94)                             |                                                                                          |                                                     |                                                                                                                       |
| Ahn et al. 2006_Cold mill                               |                             | 0.75 (0.41 to 1.30)                             |                                                                                          |                                                     |                                                                                                                       |
| Amandus 1986_All cohort members                         | Cement production           | 1.35 (0.89 to 1.96)                             | Not included                                                                             | Not included                                        | Used SMR of 1.27 (95%CI: 0.73 to 2.06)                                                                                |
| Amandus 1986_>20y latency                               |                             | 1.27 (0.73 to 2.06)                             |                                                                                          |                                                     |                                                                                                                       |
| Axelsson et al. 1980                                    | Ferrochromium               | 0.78 (0.21 to 2.01)                             | Used SMR of 0.91 (95%CI: 0.45 to 1.63)                                                   | Included, risk ratio is close to 1                  | Same as current analysis                                                                                              |
| Becker 1999_All cohort members                          | Welding                     | 0.646 (0.209 to 1.505)                          | Used SMR of 0.65 (95%CI: 0.21 to 1.51)                                                   | Included, risk ratio<1                              | Used SMR of 1.12 (95%CI: 0.30 to 2.86)                                                                                |
| Becker 1999_Coated electrodes subcohort                 |                             | 0.585 (0.071 to 2.111)                          |                                                                                          |                                                     |                                                                                                                       |
| Becker 1999_welding_period_>25%                         |                             | 1.118 (0.304 to 2.862)                          |                                                                                          |                                                     |                                                                                                                       |
| Blair et al. 1980                                       | Metal polishing, plating    | Not included, PMR study                         | Used PMR of 0.84 (95%CI 0.46 to 1.41)                                                    | Not included                                        | Not included                                                                                                          |
| Cammarano et al. 1984                                   | Thermoelectric              | Not included, does not mention Cr(VI) exposure  | Used SMR of 2.73 (95% CI: 0.56 to 7.97); poor quality study (<75 points); no SES control | Not included                                        | Not included                                                                                                          |
| Dab et al. 2011                                         | Cement production           | 0.38 (0.08 to 1.26)                             | Not included                                                                             | Not included                                        | Same as current analysis                                                                                              |
| Danielsen et al.1996_All cohort members                 | Welding                     | 0.86 (0.5 to 1.37)                              | Not included                                                                             | Not included                                        | Used SIR of 1.03 (95%CI: 0.21 to 3.03)                                                                                |
| Danielsen et al. 1996_Welding stainless steel subcohort |                             | 1.03 (0.21 to 3.03)                             | Not included                                                                             |                                                     |                                                                                                                       |
| Davies et al. 1991_All cohort members                   | Chromate production         | 0.73 (0.44 to 1.14)                             | Used SMR of 0.73 (95% CI 0.44 to 1.14)                                                   | Included, risk ratio<1                              | Used SMRs specific to the each plants. Did not use the SMR for the entire cohort                                      |
| Davies et al. 1991_Bolton plant                         |                             | 2.08 (0.76 to 4.53)                             |                                                                                          |                                                     |                                                                                                                       |
| Davies et al. 1991_Eaglescliff plant                    |                             | 0.39 (0.10 to 0.99)                             |                                                                                          |                                                     |                                                                                                                       |
| Davies et al. 1991_Ruthergien plant                     |                             | 0.7 (0.32 to 1.32)                              |                                                                                          |                                                     |                                                                                                                       |
| Dechamps et al. 1995                                    | Chromate pigment production | 1.52 (0.18 to 5.50)                             | Used SMR of 1.54 (95%CI: 0.19 to 5.56); poor quality study (<75 points); no SES control  | Included, risk ratio>1                              | Same as current analysis                                                                                              |
| Edling et al. 1986                                      | Leather tanning             | 1.5 (0.60 to 4.00)                              | Not included                                                                             | Not included                                        | Instead of SMR (used in current analysis), crude ratio or Mantel-Haenszel rate ratio of 1.6 (95%CI: 0.6 to 4.0) used. |
| Franchini et al. 1983_>10y latency                      | Chrome plating              | 3.33 (0.04 to 18.65)                            | Same as current analysis; poor quality study (<75 points); no SES control                | Included, risk ratio>1                              | Same as current analysis                                                                                              |

| Studies in Suh et al. or Welling et al. (2015) | Industry                                                      | Risk ratios and 95% CIs in the current analysis                                                                                      | Comparisons with other meta-analyses                                          |                                                     |                                                                              |
|------------------------------------------------|---------------------------------------------------------------|--------------------------------------------------------------------------------------------------------------------------------------|-------------------------------------------------------------------------------|-----------------------------------------------------|------------------------------------------------------------------------------|
|                                                |                                                               |                                                                                                                                      | Cole and Rodu et al. (2005) (Verification source: Appendix B tables 14 to 17) | Gatto et al. (2011) (Verification source: Figure 3) | Welling et al. (2015) (Verification source: Supplemental Table 1)            |
| Garabrant and Wegman et al. 1984               | Leather                                                       | Not included, PMR study                                                                                                              | Not included                                                                  | Not included                                        | Used PMR of 1.69 (95%CI: 0.97 to 2.74)                                       |
| Gonzales et al. 1991                           | Brick mason, leather                                          | Not included, general job categories without specifications of direct exposures to Cr(VI)                                            | Not included                                                                  | Not included                                        | Used OR of 1.69 (95%CI: 0.97 to 2.74) and 1.82 (95%CI: 0.40 to 8.25)         |
| Gibb et al. 2015                               | Chromate production                                           | 0.48 (0.19 to 0.99)                                                                                                                  | Used data from Gibb et al. (2000); SMR of 0.40 (95%CI: 0.08 to 1.17)          | Included data from Gibb et al. (2000)               | Data from Gibb et al. (2000) not included                                    |
| Guburan et al. 1989_Morbidity                  | Painters                                                      | 0.67 (0.26 to 1.40)                                                                                                                  | Not included                                                                  | Included, risk ratio<1                              | Not included                                                                 |
| Guburan et al. 1989_Mortality                  |                                                               | 0.24 (0.01 to 1.16)                                                                                                                  |                                                                               |                                                     |                                                                              |
| Hara et al. 2010                               |                                                               | 0.67 (0.37 to 1.06)                                                                                                                  |                                                                               |                                                     |                                                                              |
| Hayes et al. 1989_>10y employment              | Chromium platers                                              |                                                                                                                                      | Not included                                                                  | Included, risk ratio<1                              | Same as current analysis                                                     |
| Horiguchi et al. 1990_All cohort members       | Chromate pigment                                              | 2.14 (0.24 to 7.73)                                                                                                                  | Used SMR of 2.00 (95%CI: 0.54 to 5.12)                                        | Included, risk ratio>1                              | Same as current analysis                                                     |
| Horiguchi et al. 1990_10+y employment          |                                                               |                                                                                                                                      |                                                                               |                                                     |                                                                              |
|                                                | Plating                                                       | 1.23 (0.25 to 3.58)                                                                                                                  | Used SMR of 1.20 (95%CI: 0.25 to 3.50); no SES control                        | Included, risk ratio>1                              | Used the SMR for 10+ year of employment                                      |
|                                                |                                                               | 1.43 (0.02 to 7.50)                                                                                                                  |                                                                               |                                                     |                                                                              |
| Huvinen and Pukkala 2013                       | Ferrochromium and stainless steel production                  | 0.8 (0.42 to 1.40)                                                                                                                   | Not included                                                                  | Not included                                        | Same as current analysis                                                     |
| Iaia et al. 2006                               | Leather tanning                                               | 0.27 (0.01 to 1.50)                                                                                                                  | Not included                                                                  | Included, risk ratio<1                              | Not included                                                                 |
| Jakobsson et al. 1993_Morbidity                | Cement production                                             | 1.01 (0.55 to 1.69)                                                                                                                  | Not included                                                                  | Not included                                        | Used SIR of 1.14 (95%CI 0.61 to 1.94)                                        |
| Jakobsson et al. 1993_Mortality                |                                                               | 0.85 (0.45 to 1.45)                                                                                                                  |                                                                               |                                                     |                                                                              |
| Jakobsson et al. 1997                          | Stainless steel production                                    | 0.8 (0.30 to 1.70)                                                                                                                   | Used SMR of 0.83 (95%CI: 0.36 to 1.64)                                        | Not included                                        | Same as current analysis                                                     |
| Jarvholm et al. 1982                           | Polishing                                                     | Not included, does not mention Cr(VI) exposure                                                                                       | Used SMR of 9.76 (95%CI: 2.72 to 25.60); no SES control                       | Not included                                        | Used SMR of 9.76 (95%CI: 2.62 to 25.0)                                       |
| Kano et al. 1993                               | Chromate pigment production                                   | 1.2 (0.52 to 2.37)                                                                                                                   | Similar SMR and 95%CIs used compared to the current analysis                  | Included, risk ratio>1                              | Same as current analysis                                                     |
| Kneller et al. 1990                            | Leather products, leather tanning, feltmongers, pelt dressers | Not included, general job categories without specifications of direct exposures to Cr(VI), no mention of Cr(VI) anywhere in the text | Not included                                                                  | Not included                                        | Used SIR of 1.50 (95%CI: 1.13 to 1.95) and SIR of 0.94 (95%CI: 0.30 to 2.19) |
| Koh et al. 2013_All cohort members             | Cement production                                             | 1.7 (0.19 to 2.76)                                                                                                                   | Not included                                                                  | Not included                                        | Used SIR for high dust exposure category (2.18, 95%CI: 1.19 to 3.65)         |
| Koh et al. 2013_High dust exposure category    |                                                               | 2.18 (1.19 to 3.65)                                                                                                                  |                                                                               |                                                     |                                                                              |
| Korallus et al. 1993_All cohort members        | Chromate production                                           | 1.26 (0.72 to 2.05)                                                                                                                  | Used the same SMR for entire cohort; 95%CL 0.73 to 2.06                       | Included, risk ratio>1                              | Used SMRs for the specific plants                                            |
| Korallus_1993_Leverkusen                       |                                                               | 0.63 (0.17 to 1.60)                                                                                                                  |                                                                               |                                                     |                                                                              |
| Korallus_1993_Uerdingen                        |                                                               | 1.92 (1.04 to 3.24)                                                                                                                  |                                                                               |                                                     |                                                                              |
| Krstev et al. 2005_Men                         | Leather goods                                                 | 5.1 (1.0 to 25.0)                                                                                                                    | Not included                                                                  | Not included                                        | Same as current analysis                                                     |
| Krstev et al. 2005_Women                       |                                                               | 3.1 (0.70 to 14.9)                                                                                                                   |                                                                               |                                                     |                                                                              |

| Studies in Suh et al. or Welling et al. (2015)         | Industry                                     | Risk ratios and 95% CIs in the current analysis                                                                                               | Comparisons with other meta-analyses                                                    |                                                                |                                                                                                                             |
|--------------------------------------------------------|----------------------------------------------|-----------------------------------------------------------------------------------------------------------------------------------------------|-----------------------------------------------------------------------------------------|----------------------------------------------------------------|-----------------------------------------------------------------------------------------------------------------------------|
|                                                        |                                              |                                                                                                                                               | Cole and Rodu et al. (2005) (Verification source: Appendix B tables 14 to 17)           | Gatto et al. (2011) (Verification source: Figure 3)            | Welling et al. (2015) (Verification source: Supplemental Table 1)                                                           |
| Kusiack et al. 1993                                    | Uranium mining                               | Not included, does not mention Cr(VI) exposure                                                                                                | Used SMR of 1.47 (95%CI: 1.17 to 1.84); poor quality study (<75 points); no SES control | Not included                                                   | Not included                                                                                                                |
| Langard et al. 1990                                    | Ferrochromium                                | 1.45 (0.58 to 2.99)                                                                                                                           | Used SMR of 1.57 (95%CI: 0.51 to 3.66)                                                  | Included, risk ratio>1                                         | Same as current analysis                                                                                                    |
| Lipworth et al. 2011                                   | Aircraft manufacturing                       | 0.72 (0.47 to 1.05)                                                                                                                           | Not included                                                                            | Included Boice et al. (1999), risk ratio close to 1            | Same as current analysis                                                                                                    |
| Mallin et al. 1989                                     | Brick mason, stone mason                     | Not included, general job categories without specifications of direct exposures to Cr(VI)                                                     | Not included                                                                            | Not included                                                   | OR of 4.30 (95%CI: 1.18 to 15.6)                                                                                            |
| McDowall et al. 1984_All cohort members                | Cement production                            | 1.75 (1.10 to 2.65)                                                                                                                           | Not included                                                                            | Not included                                                   | Used three SMRs: 3.21 (95%CI: 0.86 to 8.22), 1.48 (95%CI 0.67 to 2.81), and 2.11 (95%CI: 0.91 to 4.16)                      |
| McDowall_1984_Laborers specified as packing or loading |                                              | 3.21 (0.86 to 8.22)                                                                                                                           |                                                                                         |                                                                |                                                                                                                             |
| Mikoczy and Hagmar 2005                                | Leather tanning                              | Not included, describes chrome tanning but also exposure to other chemicals, hard to separate                                                 | Not included                                                                            | Not included                                                   | Used SIR of 0.98 (95%CI: 0.52 to 1.68)                                                                                      |
| Mikoczy et al. 1994                                    | Leather tanning                              | 0.78 (0.36 to 1.48)                                                                                                                           | Not included                                                                            | Not included                                                   | Not included                                                                                                                |
| Montanaro et al. 1997                                  | Chrome tannery                               | 0.79 (0.38 to 1.46)                                                                                                                           | Same SMR as current analysis (95%CI: 0.38 to 1.45); no SES control                      | Included, risk ratio>1                                         | Same as current analysis                                                                                                    |
| Moulin et al. 1990                                     | Ferrochromium and stainless steel production | 2.75 (0.75 to 7.01)                                                                                                                           | Used SMR of 2.67 (95%CI: 0.73 to 6.84)                                                  | Included, risk ratio at 1                                      | Same as current analysis                                                                                                    |
| Moulin et al. 1992-PlantA                              | stainless steel production                   | 1.57 (0.43 to 4.03)                                                                                                                           | Not included                                                                            | Not included                                                   | Not included                                                                                                                |
| Moulin et al. 1992_PlantB                              | production                                   | 0.84 (0.34 to 1.73)                                                                                                                           |                                                                                         |                                                                |                                                                                                                             |
| Moulin et al. 1993a                                    | Welding                                      | 2.09 (0.77 to 4.55)                                                                                                                           | Used SMR of 2.07 (95%CI: 0.76 to 4.51)                                                  | Not included                                                   | Same as current analysis                                                                                                    |
| Moulin et al. 1993b                                    | Stainless steel production                   | 0.92 (0.37 to 1.9)                                                                                                                            | Not included                                                                            | Included, risk ratio <1                                        | Same as current analysis                                                                                                    |
| Moulin et al. 1993c                                    | Welding                                      | 3.13 (0.85 to 8.02)                                                                                                                           | Not included                                                                            | Not included                                                   | Not included                                                                                                                |
| Moulin_1995_plant1                                     | Stainless steel production                   | 1.04 (0.68 to 1.52)                                                                                                                           | Not included                                                                            | Not included                                                   | Same as current analysis                                                                                                    |
| Moulin_1995_plant2                                     | production                                   | 0.84 (0.47 to 1.38)                                                                                                                           |                                                                                         |                                                                |                                                                                                                             |
| Parent et al. 1998                                     | Leather                                      | Not included, general job categories without specifications of direct exposures to Cr(VI), authors do not mention Cr(VI) anywhere in the text | Not included                                                                            | Not included                                                   | Used OR of 1.0 (95%CI: 0.5 to 1.9)                                                                                          |
| Pippard et al. 1985                                    | Leather tanning                              | 0.52 (0.06 to 1.87)                                                                                                                           | Used SMR of 0.51 (95%CI: 0.06 to 1.84)                                                  | Included, risk ratio <1                                        | Same as current analysis                                                                                                    |
| Proctor et al. 2016                                    | Chromate production                          | 1.44 (0.18 to 2.7)                                                                                                                            | Used data from Luippold et al. (2003): SMR of 0.47 (95%CI: 0.01 to 2.62)                | Included, used data from Luippold et al. (2003), risk ratio <1 | Not included, did not include data from Luippold et al. (2003)                                                              |
| Pukkala et al. 2009                                    | Bricklayers                                  | Not included, a registry study with general occupation listings.                                                                              | Not included                                                                            | Not included                                                   | Used SIRs of 1.06 (95%CI: 0.89 to 1.25); 0.95 (95%CI: 0.76 to 1.17); 1.20 (95%CI: 1.03 to 1.40), 1.56 (95%CI: 0.19 to 5.65) |
| Rafnsson et al. 1997                                   | Masons                                       | 1.08 (0.67 to 1.65)                                                                                                                           | Used SMR of 1.27 (95%CI: 0.71 to 2.10)                                                  | Included, risk ratio is close to 1                             | Used SIR of 1.27 (95%CI: 0.71 to 2.09)                                                                                      |
| Robinson et al. 1995                                   | Brick mason                                  | Not included, PMR study                                                                                                                       | Not included                                                                            | Not included                                                   | Used PMR of 2.08 (95%CI: 1.42 to 2.93)                                                                                      |

| Studies in Suh et al. or Welling et al. (2015)   | Industry                                                           | Risk ratios and 95% CIs in the current analysis                                                                                                   | Comparisons with other meta-analyses                                                   |                                                     |                                                                        |
|--------------------------------------------------|--------------------------------------------------------------------|---------------------------------------------------------------------------------------------------------------------------------------------------|----------------------------------------------------------------------------------------|-----------------------------------------------------|------------------------------------------------------------------------|
|                                                  |                                                                    |                                                                                                                                                   | Cole and Rodu et al. (2005) (Verification source: Appendix B tables 14 to 17)          | Gatto et al. (2011) (Verification source: Figure 3) | Welling et al. (2015) (Verification source: Supplemental Table 1)      |
| Rosenman and Stanbury 1996                       | Smelter                                                            | Not included, PMR study                                                                                                                           | Not included                                                                           | Not included                                        | Used PMR of 1.87 (95%CI: 0.21 to 6.76)                                 |
| Salg and Alterman 2005                           | Bricklayers                                                        | Not included, PMR study                                                                                                                           | Not included                                                                           | Not included                                        | Used PMRs of 1.17 (95%CI: 0.50 to 2.31) and 1.31 (95%CI: 1.06 to 1.60) |
| Santibanez et al. 2012                           | Bricklayers                                                        | Not included, details on jobs are only codes (no other descriptions provided)                                                                     | Not included                                                                           | Not included                                        | Used ORs of 1.20 (95%CI: 0.65 to 2.22) and 1.37 (95%CI: 0.40 to 4.66)  |
| Satoh et al. 1981                                | Chrome production                                                  | 0.95 (0.47 to 1.70)                                                                                                                               | Same as current analysis; no SES control                                               | Included, risk ratio is close to 1                  | Same as current analysis                                               |
| Silverstein et al. 1981                          | Die-casting and electroplating                                     | Not included, PMR study                                                                                                                           | Used PMR of 1.33 (95%CI 0.36 to 3.40); poor quality study (<75 points); no SES control | Included, risk ratio>1                              | Used PMR of 2.54 (95%CI: 0.68 to 6.50)                                 |
| Sjodahl et al. 2007                              | Construction workers                                               | Not included, multiple co-exposures to other chemicals indicated                                                                                  | Not included                                                                           | Not included                                        | Used IRR 1.5 (95%CI: 1.1 to 2.1)                                       |
| Smailyte et al. 2004_All cohort members          | Cement production                                                  | 0.9 (0.40 to 1.40)                                                                                                                                | Not included                                                                           | Not included                                        | Used SMR of 1.5 (95%CI: 0.60 to 3.0)                                   |
| Smailyte et al. 2004_High dust exposure category |                                                                    | 1.5 (0.60 to 3.00)                                                                                                                                |                                                                                        |                                                     |                                                                        |
| Sorahan et al. 1987_All cohort members           | Chrome plating                                                     | 1.54 (1.00 to 2.28)                                                                                                                               | Used the same SMR (and 95%CIs) for entire cohort                                       | Included, risk ratio>1                              | Used SMRs of 0.32 (95%CI: 0.01 to 1.78), 2.06 (95%CI: 1.10 to 3.52)    |
| Sorahan et al. 1987_Chrome bath subcohort        |                                                                    | 1.49 (0.81 to 2.5)                                                                                                                                |                                                                                        |                                                     |                                                                        |
| Sorahan et al. 1994_All cohort members           | Steel foundry                                                      | 1.34 (1.11 to 1.60)                                                                                                                               | Used the same SMR (and 95%CIs) for entire cohort                                       | Included, risk ratio>1                              | Not included                                                           |
| Sorahan et al. 1994_>15y_employment              |                                                                    | 0.85 (0.47 to 1.53)                                                                                                                               |                                                                                        |                                                     |                                                                        |
| Sorahan and Harrington 2000_Men                  | Chrome plating                                                     | 1.68 (0.87 to 2.94)                                                                                                                               | Used SMR of 1.56 (95%CI: 0.81 to 2.73)                                                 | Included, risk ratio>1                              | Used SMR of 1.68 (95%CI: 0.87 to 2.94)                                 |
| Sorahan and Harrington 2000_Women                |                                                                    | 0 (NA)                                                                                                                                            |                                                                                        |                                                     |                                                                        |
| Stern et al. 2001                                |                                                                    | Not included, PMR study                                                                                                                           | Not included                                                                           | Not included                                        | Used PMR of 1.64 (95%CI: 1.35 to 1.98)                                 |
| Sweeney et al. 1985                              | Fur dressers                                                       | 1.37 (0.15 to 4.95)                                                                                                                               | Not included                                                                           | Not included                                        | Same as current analysis                                               |
| Walrath et al. 1987                              | Leather                                                            | Not included, PMR study                                                                                                                           | Not included                                                                           | Not included                                        | Used PMRs of 1.28 (95%CI: 0.70 to 2.15), 1.83 (95%CI: 1.43 to 2.31)    |
| Weiderpass et al. 2003                           | All types of occupations                                           | Not included, occupations not provided, unclear as to how job titles were converted to exposures to 31 occupational agents                        | Not included                                                                           | Not included                                        | Used RR of 0.50 (95%CI: 0.23 to 1.12)                                  |
| Xu et al. 1996                                   | Plating                                                            | 2.4 (0.90 to 6.1)                                                                                                                                 | Not included                                                                           | Not included                                        | Used ORs of 1.2 (95%CI: 0.3 to 4.3) and 2.1 (95%CI: 0.7 to 6.3)        |
| Zhang et al. 1997                                | Not applicable; ecologic drinking water study of Chinese villagers | Not included for meta-analysis because ecologic study, however, narratively characterized Beaumont et al. (2008) and Kerger et al. (2009) studies | SMR of 0.75 (95%CI: 0.44 to 1.20)                                                      | Not included                                        | Not included                                                           |
