# Supplementary material
Source: publisher figshare collection journal article supplement (https://tandf.figshare.com/articles/dataset/_/11662914)
Supplement: Supplementary file 1 [file 1 › itxc_a_1578730_sm0297.docx]

**Supplemental Figures**

**Figure S1: Risk of bias assessment and tier classifications for human occupational studies (n=44). Colors: red, (-2; definitely high risk of bias), pink (-1; probably high risk of bias), light green (+1; probably low risk of bias), dark green (+2; definitely low risk of bias). Tiers: 1 (Tier 1), 2 (Tier 2), 3 (Tier 3)**

Notes: Bold text indicates key questions by NTP OHAT (2015). Q1, Q2, Q5, and Q6 pertain to experimental studies (human and animal) and thus not evaluated herein. NTP OHAT’s definitions of Tier 1: “Definitely low” or “probably low” risk of bias for key item, “Definitely low” or “probably low” risk of bias for most other applicable criteria; Tier 2: Study does not meet criteria for “low” (Tier 1) or “high” (Tier 3); Tier 3: “Definitely high” or “probably high” risk of bias for key items AND “definitely high” or “probably high” risk of bias for most other applicable criteria.

**Figure S2: Meta-analysis 3: Tier 1 studies (n =8)**

**
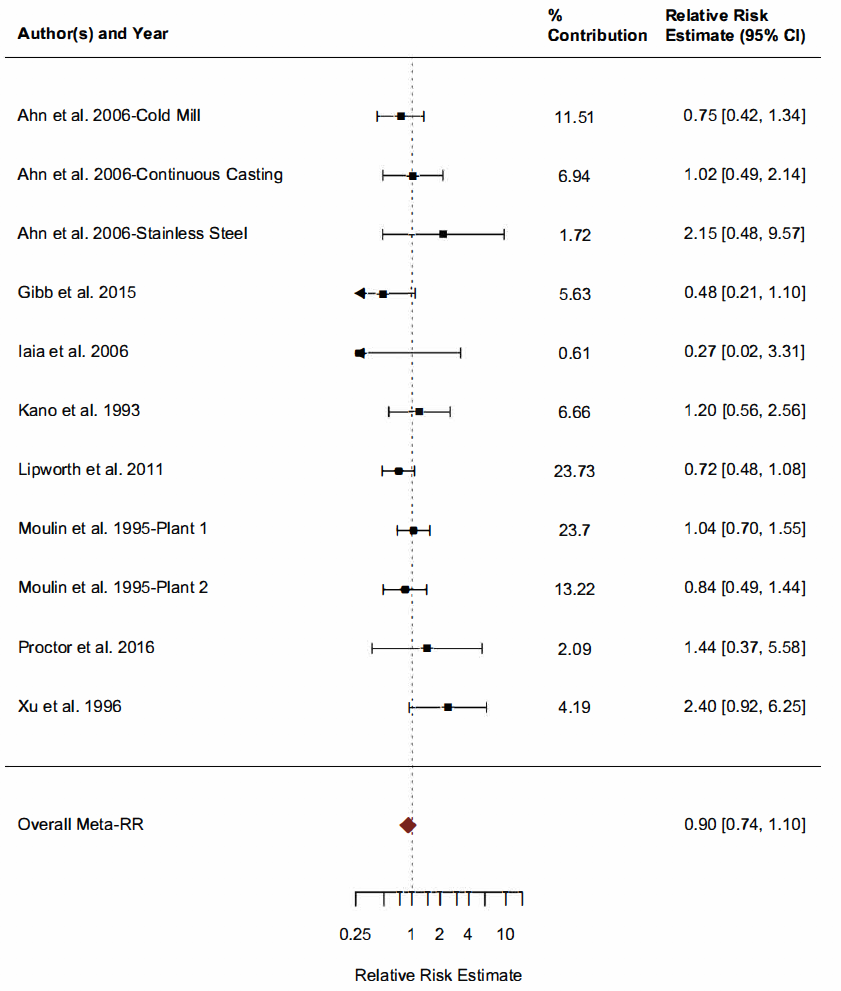
**

Note: For the individual studies, 95%CIs are calculated intervals based on the effect size and parameters of the random-effects model

**Figure S3: Meta-analysis 4a: Cohort studies (n =41)**


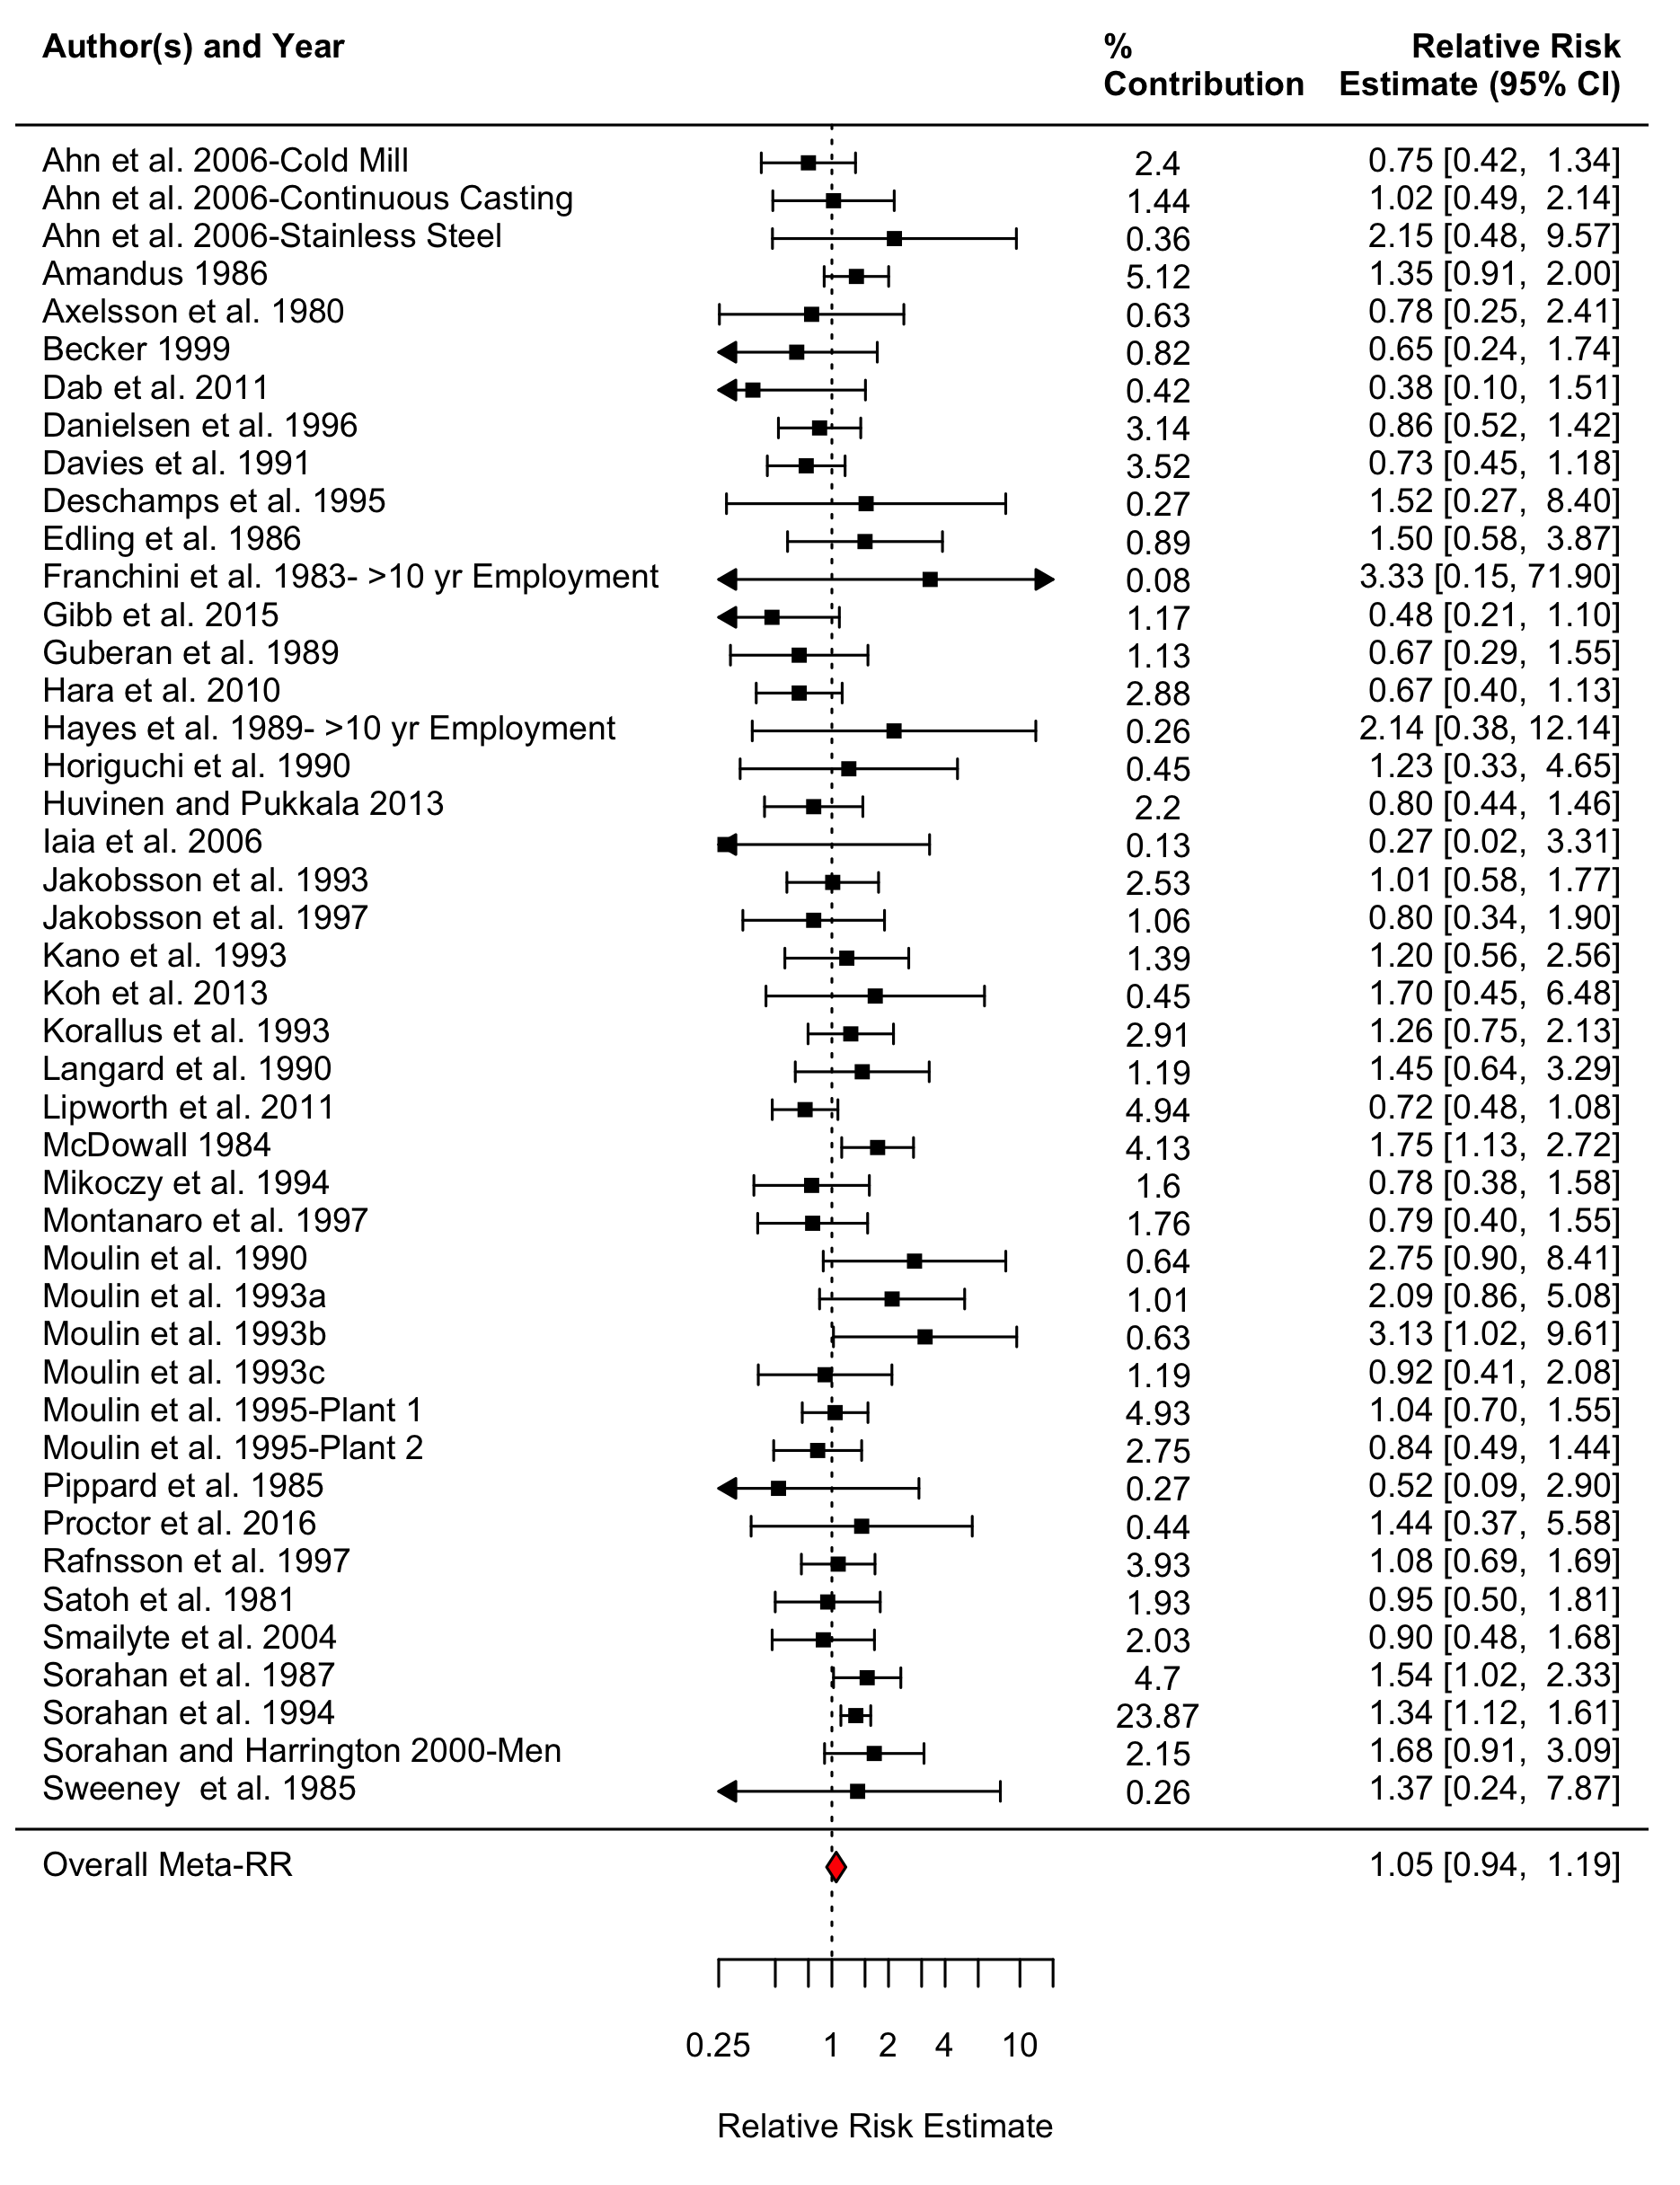


Note: For the individual studies, 95%CIs are calculated intervals based on the effect size and parameters of the random-effects model

**Figure S4**. **Meta-analysis 4b: Case-control studies (n=3)**


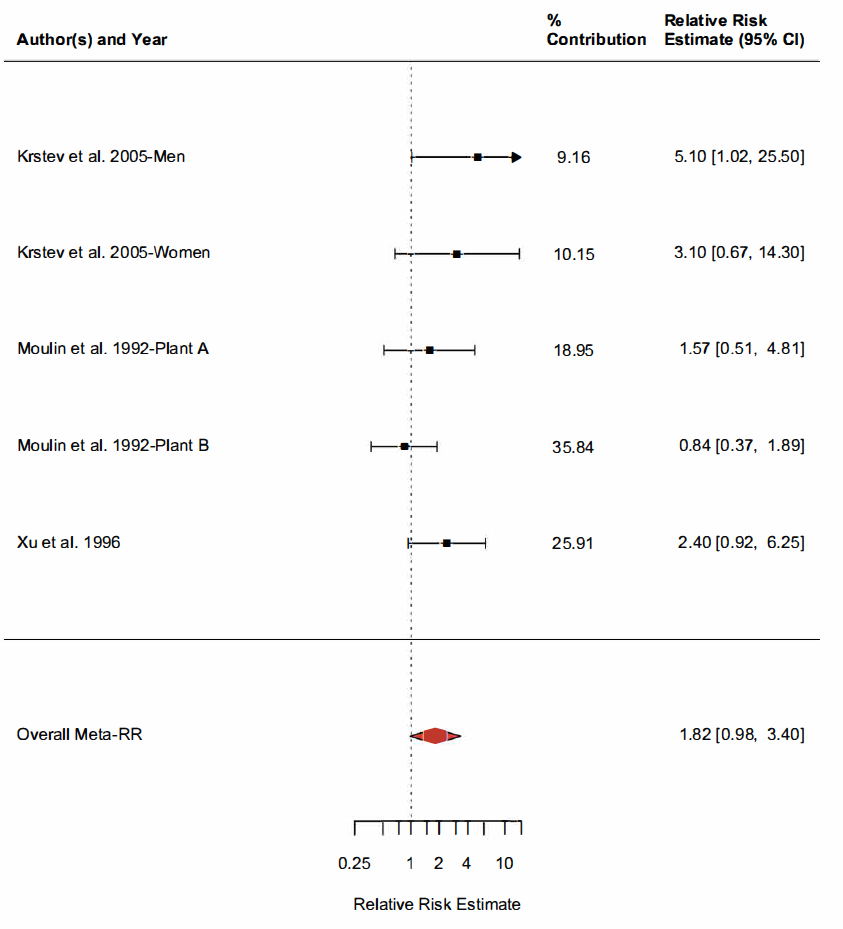


Note: For the individual studies, 95%CIs are calculated intervals based on the effect size and parameters of the random-effects model

**Figure S5**. **Meta-Analysis 5: Sub-groups: Identified by the study authors as high exposure groups (n=13)**

**
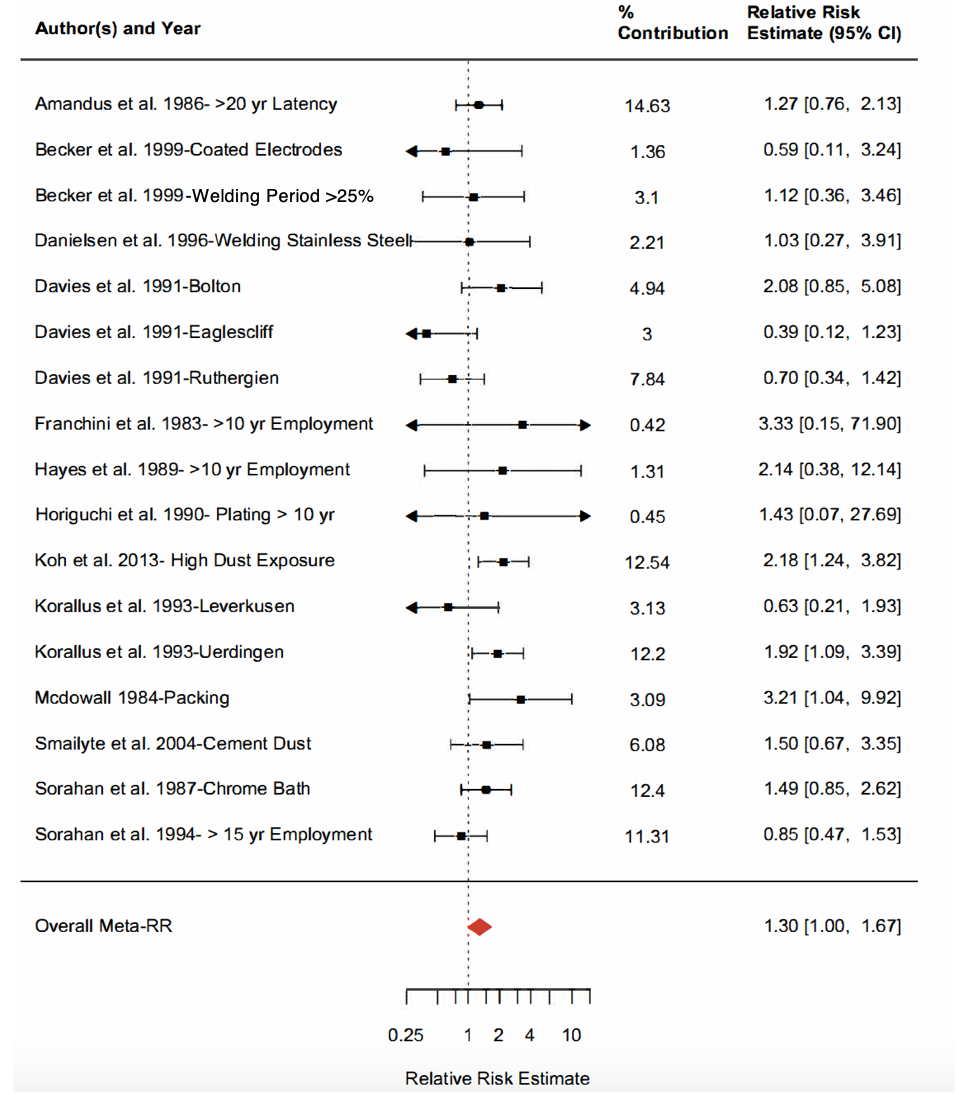
**

Note: For the individual studies, 95%CIs are calculated intervals based on the effect size and parameters of the random-effects model

**Figure S6: Meta-Analysis 6: Industries associated with increased lung cancer risk from Cr(VI) (i.e., chromate production, pigment production, plating, ferrochromium production) (n=19)**


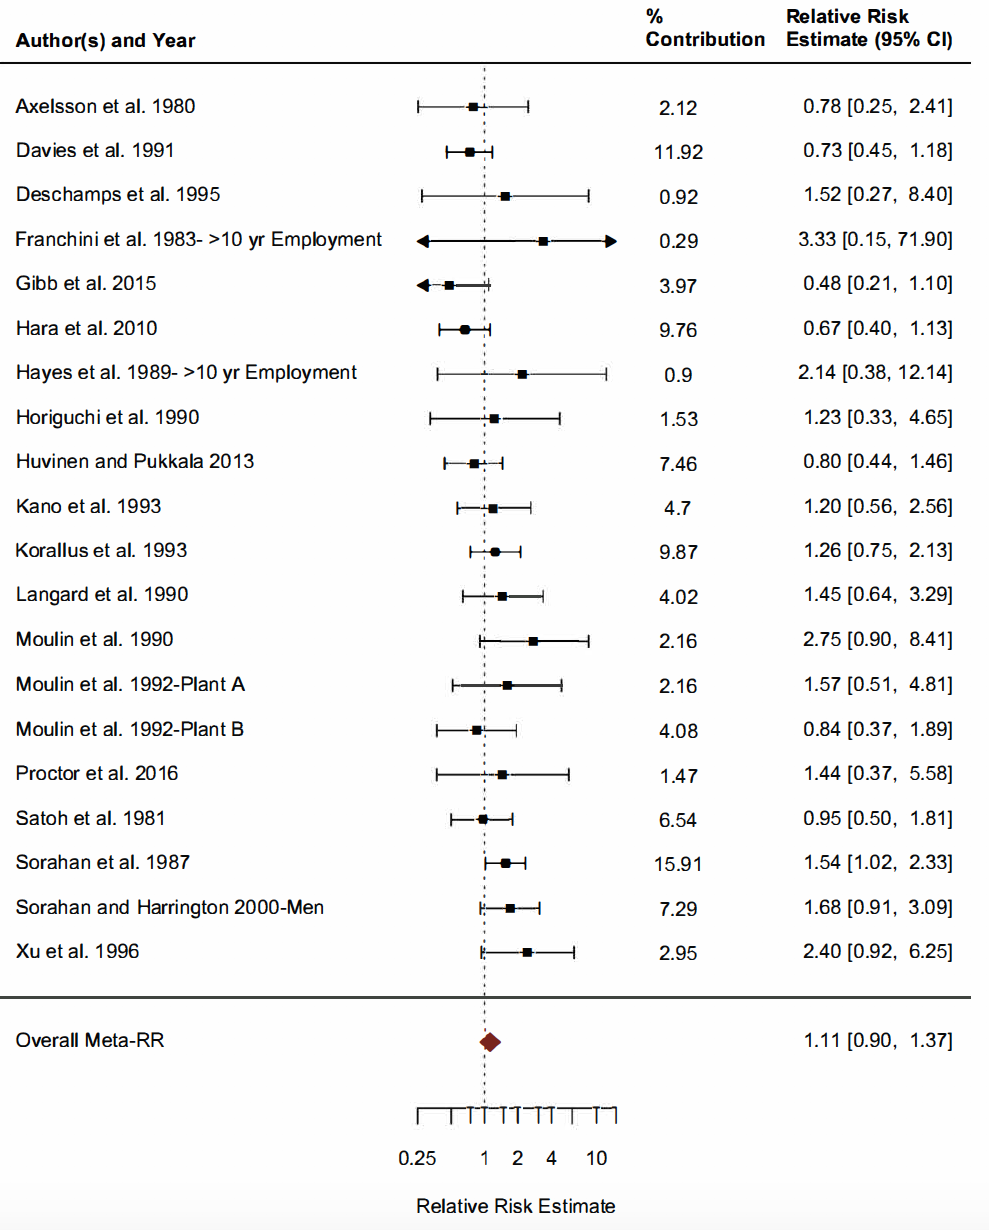


Note: For the individual studies, 95%CIs are calculated intervals based on the effect size and parameters of the random-effects model

**Figure S7: Meta-Analysis 7: Cohort studies (Tier 3 removed) (n= 11)**


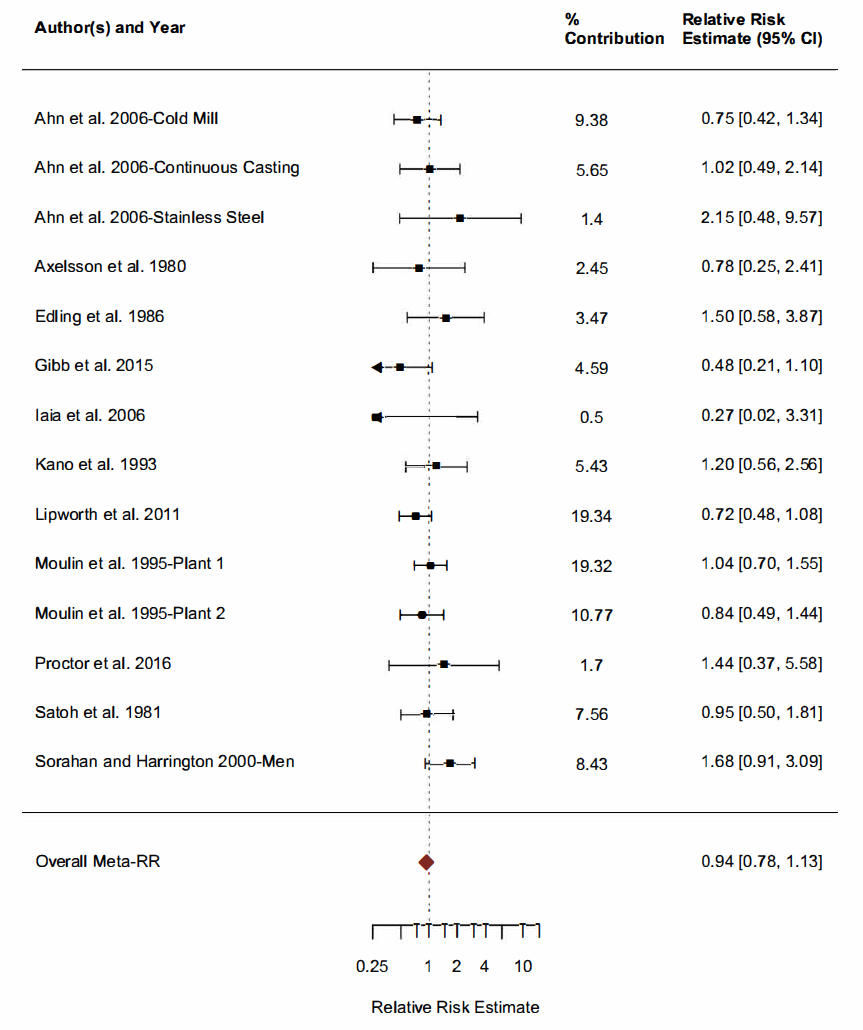


Note: For the individual studies, 95%CIs are calculated intervals based on the effect size and parameters of the random-effects model

**Figure S8. Meta-Analysis 8: Industries with evidence of increased lung cancer risk associated with Cr(VI) exposure (Tier 3 removed) (n=7)**


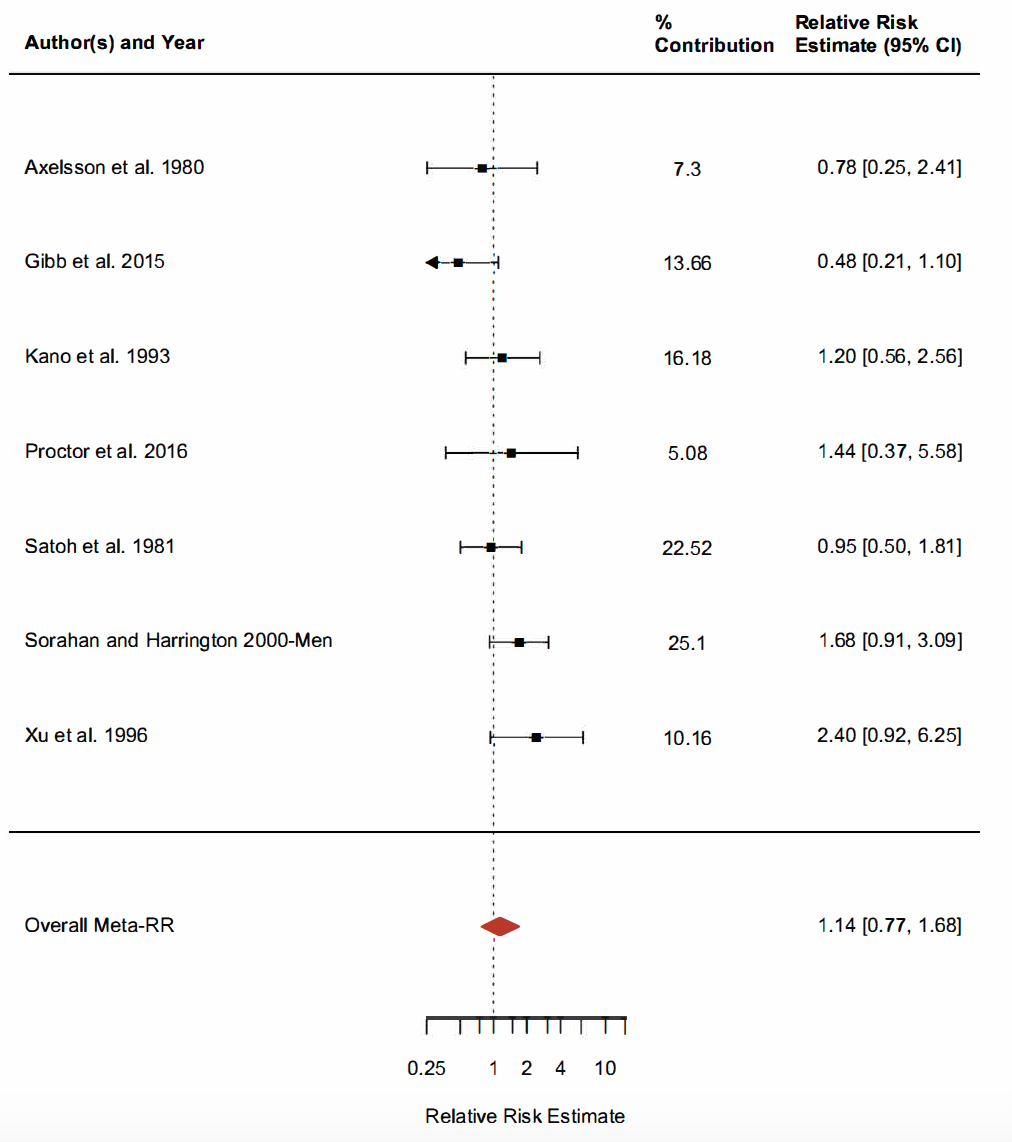


Note: For the individual studies, 95%CIs are calculated intervals based on the effect size and parameters of the random-effects model
